# Supplementary material for: MaveQuest: a web resource for planning experimental tests of human variant effects
Source: PubMed Central journal article supplement (PMC7320626; doi:10.1093/bioinformatics/btaa228), 2020-04-06
Supplement: btaa228_supplementary_data.pdf [file btaa228_supplementary_data.pdf]

**Supplementary Table S1.** A simplified summary of the application programming interface (API) of MaveQuest. A complete guide of the API service with sample requests and responses are available at <https://mavequest.varianteffect.org/docs/api>.

| <b>Category</b> | <b>Method</b> | <b>Function</b> | <b>Description</b>                                                           |
|-----------------|---------------|-----------------|------------------------------------------------------------------------------|
| Summary         | GET           | /stats          | Returns database statistics.                                                 |
| Summary         | GET           | /genes          | Returns all records that passed a filter.                                    |
| Gene            | GET           | /lookup         | Returns primary ID and other information, given a gene in a certain species. |
| Gene            | GET           | /gene           | Returns records, given gene(s) identifiers.                                  |
| Gene            | GET           | /detail         | Returns detailed records, given a gene symbol.                               |
| Interactome     | GET           | /interactome    | Returns interaction details in HuRI database.                                |
